# Supplementary material for: Performance of Oxalic Acid-Chitosan/Alumina Ceramic Biocomposite for the Adsorption of a Reactive Anionic Azo Dye
Source: Research Square preprint supplement (doi:10.21203/rs.3.rs-232589/v1), 2021-03-09
Supplement: Supplementary file 1 [file b9662352ffb61330cfb1762b.docx]

| **Table 4.** Maximum adsorption capacities (Qm) of different materials used in  the adsorption of RR195 | | | |
| --- | --- | --- | --- |
| **Adsorbent** | **Qm**  **(mg g-1)** | **Optimal conditions** | **Reference** |
| **Biocomposite of crosslinked oxalic acid-chitosan/alumina ceramic pellets** | 345.3 | 303 K, pH=2 | Present study |
| Wheat bran | 119 | 20 ºC, pH=1 | Çiçek et al., (2007) |
| Hydrogels of reticulated  chitosan-oxalic acid | 110.7 | 45 ºC, pH=4 | Pérez-Calderón et al.,(2020) |
| TiO2 Nanoparticles | 87 | 30 ºC, pH=3 | Belessi et al., (2009) |
| Chitosan beads particles  (Hydrogels) | 82.1 | 25ºC, pH=4 | Pérez-Calderón et al., (2018) |
